# Supplementary material for: A kinetic model for the formation of gastric N-nitroso compounds
Source: Royal Society of Chemistry journal article supplement (doi:10.1039/c8ob02003e), 1982-01-01
Supplement: c8ob02003e1.pdf [file c8ob02003e1.pdf]

*Supporting Information*

**Attenuation of guanine oxidation via DNA-mediated electron transfer  
in crowded environment using small cosolutes**

Makiko Tanaka,\* Takayuki Matsumoto and Hiroki Iida

*Department of Engineering Science, Graduate School of Informatics and Engineering,  
The University of Electro-Communications, 1-5-1 Chofugaoka, Chofu, Tokyo 182-8585  
Japan*

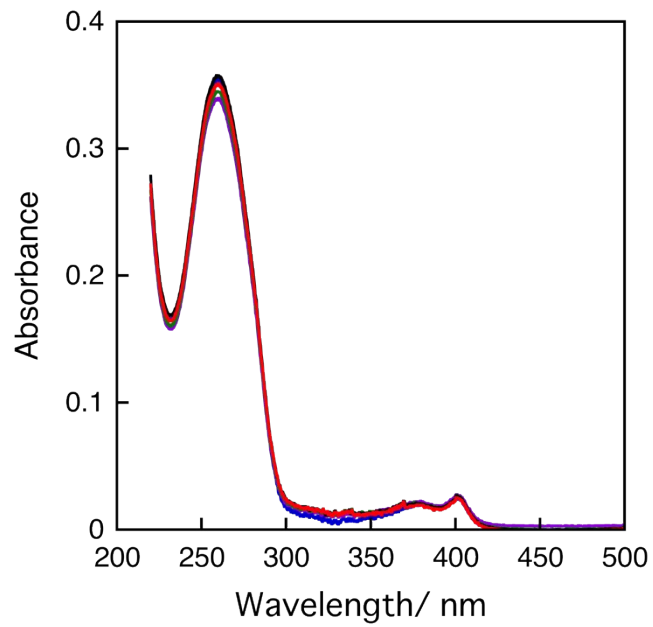

**Fig. S1** Absorption spectra of DNA I in aqueous buffer solution (blue line), 10 wt % (purple line), 20 wt % (green line), 30 wt % (black line), 40 wt % glycerol (red line). Aliquots were prepared under the conditions: [DNA duplex] = 4.0  $\mu$ M, and [NaCl] = 100 mM in pH 7.4 Tris-HCl buffer (50 mM).

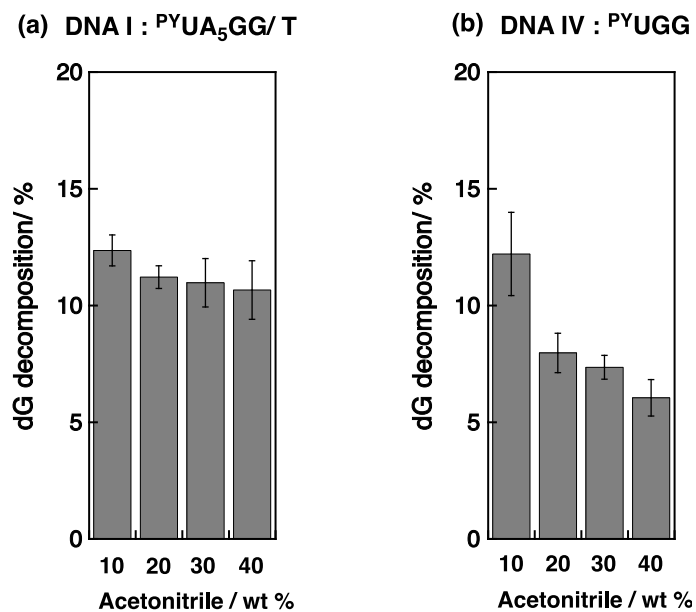

**Fig. S2** dG decomposition percentages of pyrene-modified oligonucleotides (a) DNA I from photoirradiation ( $\lambda_{\text{ex}} > 350$  nm, 10 min), and (b) DNA IV obtained from photoirradiation ( $\lambda_{\text{ex}} > 350$  nm, 1 min) in 10 – 40 wt % acetonitrile. The conditions were as follows: [DNA] = 4.0  $\mu\text{M}$  in pH 7.4 Tris-HCl buffer (50 mM), and [NaCl] = 100 mM.

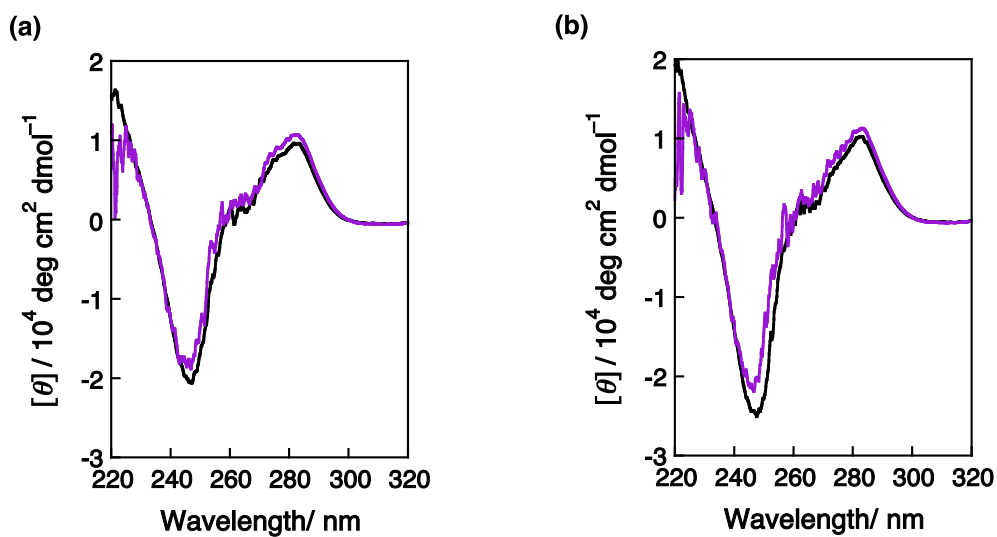

**Fig. S3** (a) CD spectra of DNA I in aqueous buffer solution (black line) and in 40 wt % acetonitrile solution (purple line). (b) CD spectra of DNA IV in aqueous buffer solution (black line) and in 40 wt % acetonitrile solution (purple line). These spectra were obtained using a micro cell holder with a micro cylindrical cel. Experimental conditions: [DNA duplex] = 4.0  $\mu\text{M}$ , and [NaCl] = 100 mM in pH 7.4 Tris-HCl buffer (50 mM).

**Table S1.** Viscosities ( $\eta$ ) of aqueous glycerol and ethylene glycol solutions.

| <b>Cosolute</b>  | $\eta$ / mPa·s <sup>a</sup> | <b>Cosolute</b>         | $\eta$ / mPa·s <sup>a</sup> |
|------------------|-----------------------------|-------------------------|-----------------------------|
| none             | 0.98                        | none                    | 0.98                        |
| 10 wt % glycerol | 1.28                        | 10 wt % ethylene glycol | 1.28                        |
| 20 wt % glycerol | 1.72                        | 20 wt % ethylene glycol | 1.67                        |
| 30 wt % glycerol | 2.47                        | 30 wt % ethylene glycol | 2.14                        |
| 40 wt % glycerol | 3.60                        | 40 wt % ethylene glycol | 2.80                        |

<sup>a</sup>Measured in aqueous glycerol or ethylene glycol solutions containing 50 mM Tris-HCl (pH7.4) and 100 mM NaCl at 23.6 °C.

**Table S2.** Melting temperatures ( $T_m$ ) for dsDNA I and IV in the absence and presence of acetonitrile.

| <b>Cosolute</b>      | <b><math>T_m</math>, °C</b> | <b><math>T_m</math>, °C</b> |
|----------------------|-----------------------------|-----------------------------|
|                      | <b>DNA I</b>                | <b>DNA IV</b>               |
| none                 | 53.7                        | 54.8                        |
| 10 wt % acetonitrile | 49.4                        | 50.5                        |
| 20 wt % acetonitrile | 44.2                        | 45.6                        |
| 30 wt % acetonitrile | 40.3                        | 41.6                        |
| 40 wt % acetonitrile | 38.0                        | 39.3                        |

Experimental conditions: [DNA duplex] = 4.0  $\mu$ M in 50 mM Tris-HCl, pH7.4, 100 mM NaCl.  $T_m$  is determined by monitoring the UV absorption at 260 nm. The error of  $T_m$  was less than 0.5 °C.
